# Supplementary material
Source: Springer Nature journal article supplement (https://www.springermedizin.de/resource/supplementary/12885_2009_1971_MOESM1_ESM.pdf/9460214)

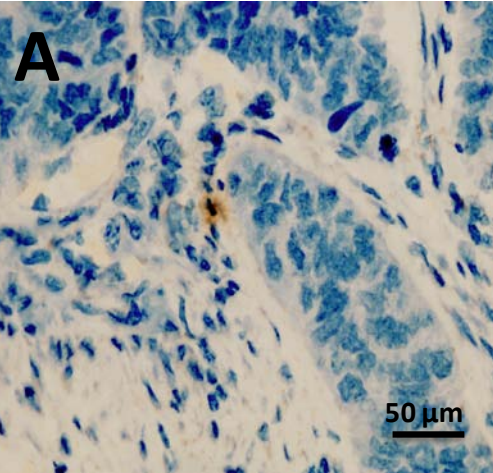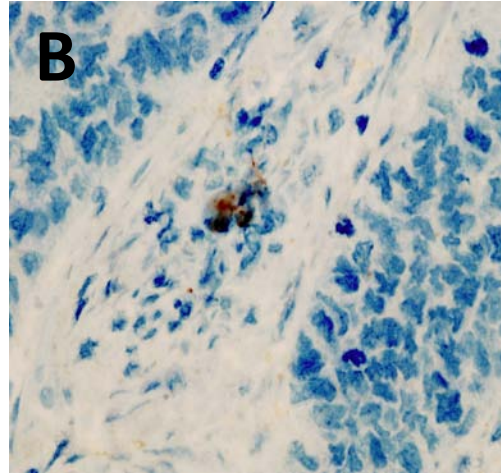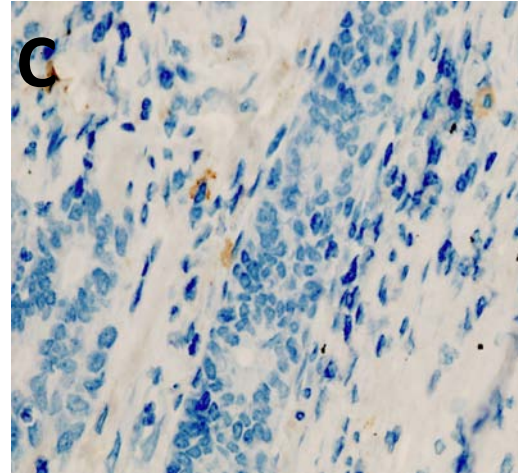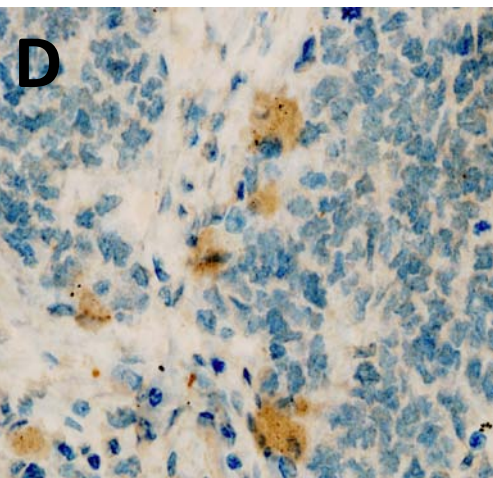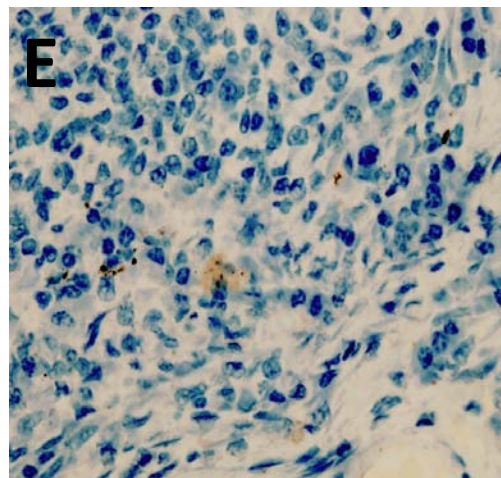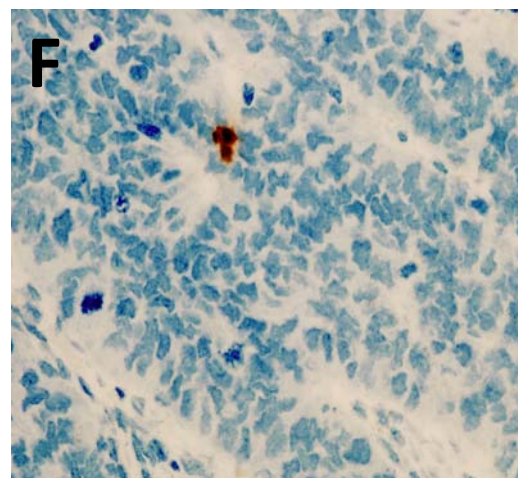

Supplement: MOESM1 [file 9460214]
